# Supplementary material for: Chronic kidney disease and the risk of cancer: an individual patient data meta-analysis of 32,057 participants from six prospective studies
Source: PubMed Central journal article supplement (PMC4947287; doi:10.1186/s12885-016-2532-6), 2016-07-16
Supplement: 12885_2016_2532_MOESM4_ESM.pdf [file 12885_2016_2532_MOESM4_ESM.pdf]

## Additional file 2: Relevance of renal function to site specific cancer incidence after adjustment for age, sex, ethnicity and smoking status

|                               | Hazard ratio (95% Confidence Interval) by CKD status (CKD EPI-estimated GFR (mL/min/1.73m <sup>2</sup> )) |                    |                    |                       |                       | P value for trend across groups |
|-------------------------------|-----------------------------------------------------------------------------------------------------------|--------------------|--------------------|-----------------------|-----------------------|---------------------------------|
|                               | Greater than 75 (n=9594)                                                                                  | 60 to 75 (n=6681)  | 45 to 60 (n=4931)  | Less than 45 (n=8808) | Dialysis (n=3023)     |                                 |
| Oral cavity and pharynx       | 1.00                                                                                                      | 1.04 (0.45 - 2.41) | 1.17 (0.48 - 2.90) | 1.09 (0.28 - 4.21)    | 2.57 (0.53 - 12.46)   | 0.44                            |
| Digestive†                    | 1.00                                                                                                      | 1.01 (0.82 - 1.26) | 0.96 (0.76 - 1.23) | 0.99 (0.70 - 1.40)    | 1.51 (0.94 - 2.42)    | 0.32                            |
| Respiratory†                  | 1.00                                                                                                      | 1.08 (0.79 - 1.47) | 0.86 (0.60 - 1.24) | 0.69 (0.39 - 1.23)    | 1.05 (0.51 - 2.18)    | 0.64                            |
| Melanomas                     | 1.00                                                                                                      | 0.93 (0.48 - 1.78) | 1.71 (0.92 - 3.20) | 1.60 (0.66 - 3.85)    | 1.86 (0.54 - 6.44)    | 0.23                            |
| Breast†                       | 1.00                                                                                                      | 0.99 (0.69 - 1.42) | 1.07 (0.73 - 1.54) | 1.22 (0.72 - 2.07)    | 1.03 (0.46 - 2.30)    | 0.74                            |
| Female genital                | 1.00                                                                                                      | 0.98 (0.50 - 1.90) | 0.88 (0.43 - 1.79) | 1.49 (0.60 - 3.66)    | 1.73 (0.51 - 5.89)    | 0.46                            |
| Prostate†                     | 1.00                                                                                                      | 0.78 (0.56 - 1.09) | 0.84 (0.59 - 1.21) | 0.72 (0.40 - 1.30)    | 0.38 (0.18 - 0.83)    | 0.03                            |
| Soft tissue/connective tissue | 1.00                                                                                                      | 0.96 (0.19 - 4.83) | 2.16 (0.48 - 9.68) | 5.62 (1.07 - 29.62)   | -*                    | 0.11                            |
| Urinary tract†                | 1.00                                                                                                      | 0.89 (0.55 - 1.44) | 1.35 (0.83 - 2.19) | 1.66 (0.85 - 3.24)    | 2.34 (1.10 - 4.97)    | 0.06                            |
| Central nervous system        | 1.00                                                                                                      | 1.02 (0.45 - 2.29) | 0.60 (0.22 - 1.59) | 0.74 (0.19 - 2.93)    | 0.87 (0.10 - 7.49)    | 0.71                            |
| Endocrine                     | 1.00                                                                                                      | 0.51 (0.10 - 2.67) | 1.82 (0.49 - 6.75) | 2.13 (0.30 - 15.07)   | 11.65 (1.30 - 104.12) | 0.12                            |
| Haematological†               | 1.00                                                                                                      | 0.89 (0.59 - 1.34) | 0.71 (0.45 - 1.13) | 0.63 (0.31 - 1.27)    | 0.72 (0.29 - 1.76)    | 0.25                            |

†Results also presented in Figure 3. \*There were no incident cancers of type soft tissue/connective tissue observed for those on dialysis, so a HR could not be estimated.
