# Supplementary material for: Chronic kidney disease and the risk of cancer: an individual patient data meta-analysis of 32,057 participants from six prospective studies
Source: BMC Cancer. 2016 Jul 16;16:488. doi: 10.1186/s12885-016-2532-6 (PMC4947287; doi:10.1186/s12885-016-2532-6)
Supplement: Additional file 3: — Relevance of renal function to cancer incidence and cancer death, after adjustment for age, sex, ethnicity and smoking status, using Fine and Gray regression. (PDF 9 kb) [file 12885_2016_2532_MOESM3_ESM.pdf]

**Additional file 4: Relevance of renal function to cancer incidence and cancer death, after adjustment for age, sex, ethnicity and smoking status, using Fine and Gray regression**

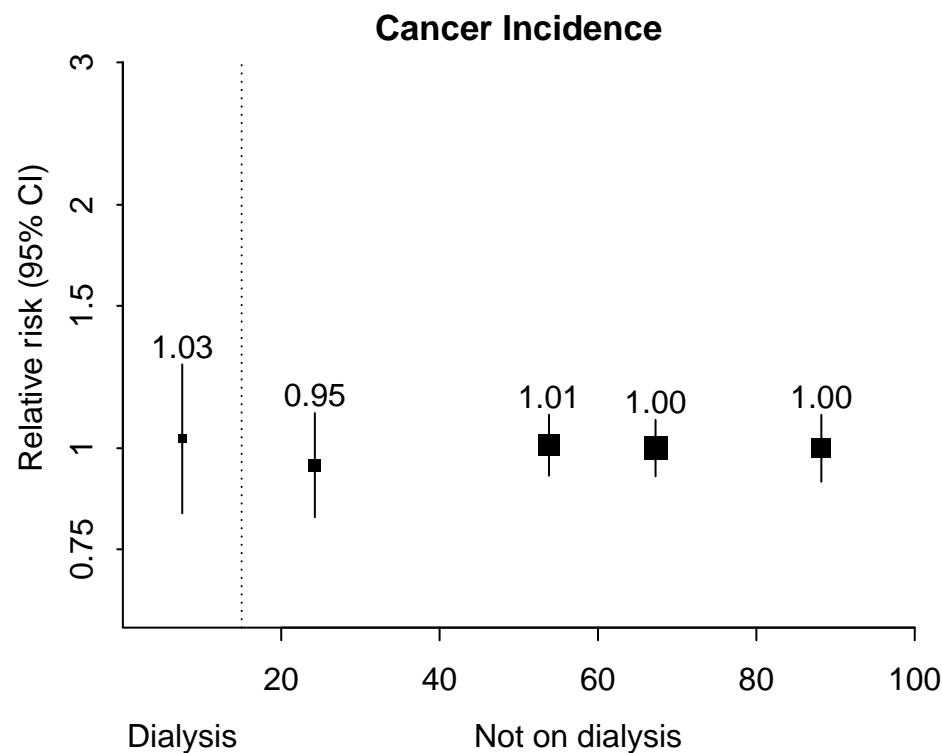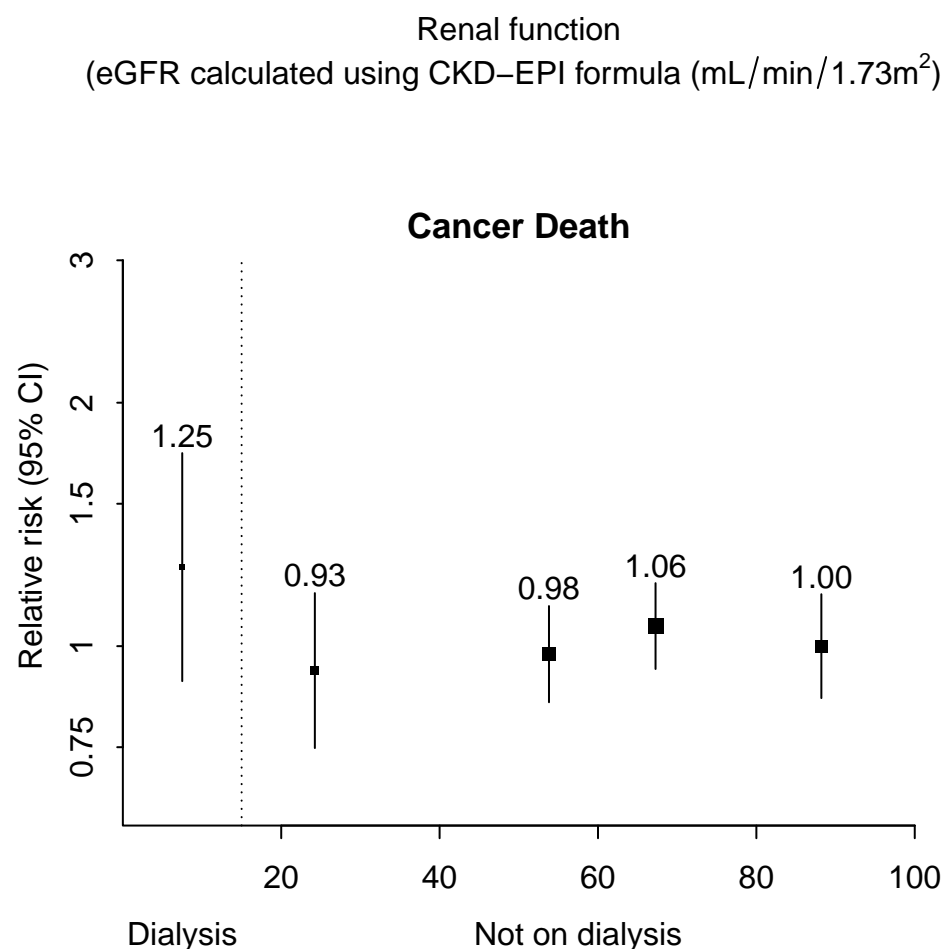

Relative risks are stated above 95% CI and the number of events is given below 95% CI.
