# Supplementary material for: Chronic kidney disease and the risk of cancer: an individual patient data meta-analysis of 32,057 participants from six prospective studies
Source: Springer Nature journal article supplement (doi:10.1186/s12885-016-2532-6), 2016-07-16
Supplement: MOESM1 [file 10496272]

## Additional file 1: Baseline characteristics of 32057 eligible participants, by study

|                                                    | <b>ADVANCE<br/>(n=11096)</b> | <b>PROGRESS<br/>(n=6001)</b> | <b>SHARP<br/>(n=9052)</b> | <b>BMES<br/>(n=3882)</b> | <b>IDEAL<br/>(n=828)</b> | <b>CAIFOS<br/>(n=1198)</b> |
|----------------------------------------------------|------------------------------|------------------------------|---------------------------|--------------------------|--------------------------|----------------------------|
| Age at baseline (years)                            | 66 (6)                       | 64 (10)                      | 62 (12)                   | 71 (10)                  | 60 (12)                  | 75 (3)                     |
| Male                                               | 6386 (58%)                   | 4173 (70%)                   | 5657 (62%)                | 1669 (43%)               | 542 (65%)                | 0 (0%)                     |
| Ethnicity                                          |                              |                              |                           |                          |                          |                            |
| White                                              | 6643 (60%)                   | 3568 (59%)                   | 6484 (72%)                | 3778 (97%)               | 592 (71%)                | 1198 (100%)                |
| Asian                                              | 4240 (38%)                   | 2326 (39%)                   | 2047 (23%)                | 16 (<1%)                 | 73 (9%)                  | 0 (0%)                     |
| Other/not specified                                | 213 (2%)                     | 107 (2%)                     | 521 (6%)                  | 88 (2%)                  | 163 (20%)                | 0 (0%)                     |
| Higher education                                   | -                            | -                            | 2271 (25%)                | 1677 (43%)               | 148 (18%)                | -                          |
| Ever smoked                                        | 4653 (42%)                   | 3462 (58%)                   | 4415 (49%)                | 1968 (51%)               | 498 (60%)                | 433 (36%)                  |
| Body mass index (kg/m <sup>2</sup> )               | 28.3 (5.2)                   | 25.7 (3.8)                   | 27.1 (5.6)                | 26.6 (4.7)               | 29.0 (6.0)               | 27.1 (4.6)                 |
| Systolic blood pressure (mm Hg)                    | 145 (22)                     | 147 (19)                     | 139 (22)                  | 145 (32)                 | 143 (21)                 | 138 (18)                   |
| Diastolic blood pressure (mm Hg)                   | 81 (11)                      | 86 (11)                      | 79 (13)                   | 85 (27)                  | 79 (11)                  | 73 (11)                    |
| MDRD-estimated GFR (mL/min/1.73m <sup>2</sup> )    | 78.1 (24.7)                  | 77.8 (23.7)                  | 26.6 (13.0)               | 65.6 (17.4)              | 9.8 (2.3)                | 69.5 (14.4)                |
| CKD EPI-estimated GFR (mL/min/1.73m <sup>2</sup> ) | 74.5 (17.6)                  | 74.6 (18.3)                  | 25.4 (13.0)               | 63.1 (16.8)              | 8.9 (1.9)                | 66.6 (13.3)                |
| Total cholesterol (mg/dL)                          | 201 (46)                     | -                            | 189 (46)                  | 229 (42)                 | 174 (50)                 | 227 (42)                   |
| Triglycerides (mg/dL)                              | 173 (114)                    | -                            | 206 (152)                 | 173 (112)                | 193 (157)                | 139 (65)                   |
| On dialysis                                        | 0 (0%)                       | 0 (0%)                       | 3025 (33%)                | 0 (0%)                   | 0 (0%)                   | 0 (0%)                     |
| Follow-up time (years)                             | 5.0 (4.7-5.0)                | 4.0 (3.6-4.4)                | 4.4 (3.9-5.4)             | 14.6 (8.8-16.0)          | 4.2 (2.8-5.7)            | 10.3 (10.1-10.5)           |

Mean (SD), median (IQR) or n (%) shown.
