# Supplementary material for: Chronic kidney disease and the risk of cancer: an individual patient data meta-analysis of 32,057 participants from six prospective studies
Source: Springer Nature journal article supplement (doi:10.1186/s12885-016-2532-6), 2016-07-16
Supplement: MOESM2 [file 10496272]

**Additional file 3: Relevance of renal function to cancer incidence and death, after adjustment for age, sex, ethnicity and smoking status, excluding events in the first 2 years of follow-up**

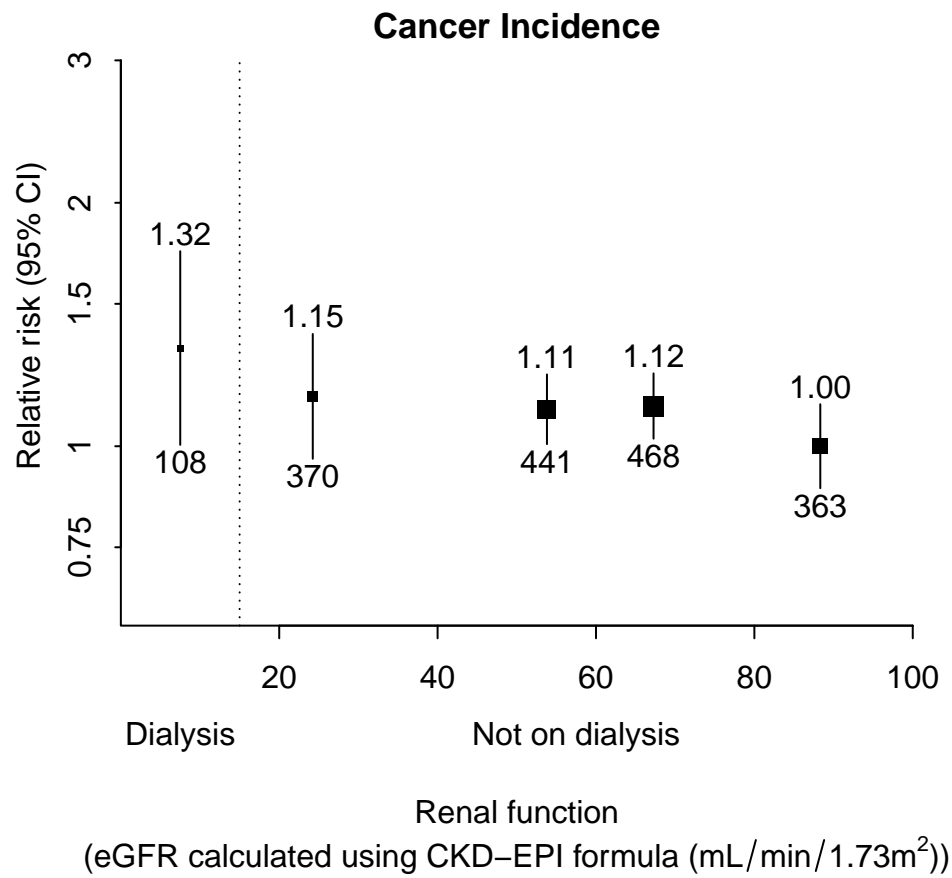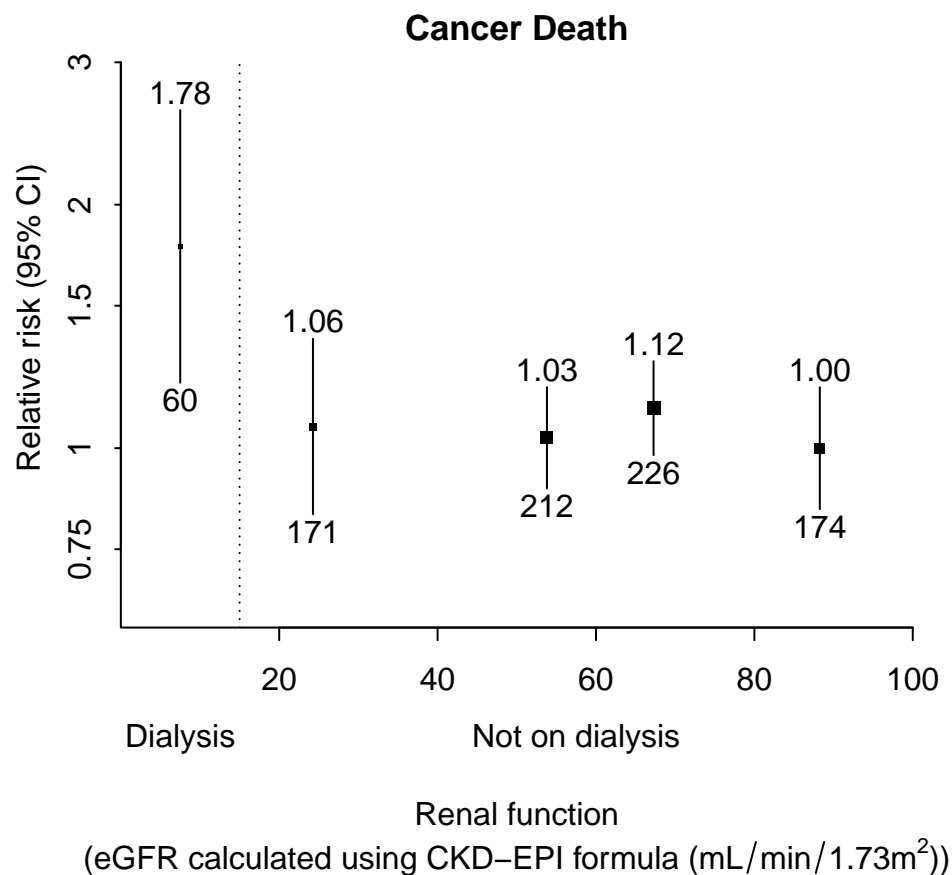

Relative risks are stated above 95% CI and the number of events is given below 95% CI.
